# Supplementary material for: Infection-adapted emergency hematopoiesis promotes visceral leishmaniasis
Source: PubMed Central journal article supplement (PMC5560750; doi:10.1371/journal.ppat.1006422), 2017-08-07
Supplement: ppat.1006422.s012.pdf [file ppat.1006422.s012.pdf]

| Antigen                 | Fluorochrome          | Clone        | Supplier                                 |
|-------------------------|-----------------------|--------------|------------------------------------------|
| Active caspase-3        | Alexa Fluor 488       | -            | Cell Signaling Technologies              |
| Active $\beta$ -catenin | Unconjugated          | D13A1        | Cell Signaling Technologies              |
| Arginase-1              | PE                    | -            | R&D Systems, Minneapolis, MN             |
| CCR2                    | Alexa Fluor 700       | -            | R&D Systems                              |
| CD105                   | Pacific Blue          | MJ7-I8       | eBioscience, San Diego, CA               |
| CD115                   | PE-Cy7, FITC          | AFS98        | eBioscience                              |
| CD117 (cKit)            | PE                    | 2B8          | BD Biosciences, Mississauga, ON, Canada  |
| CD11b                   | Biotin                | M1/70        | BD Biosciences                           |
| CD11b                   | Alexa Fluor 647       | M1/70        | eBioscience                              |
| CD135 (Flt3)            | PerCP-eFluor 710      | A2F10        | BD Biosciences                           |
| CD150                   | Alexa Fluor 647       | TC15-12F12.2 | BD Biosciences; BioLegend, San Diego, CA |
| CD16/32                 | PerCP-Cy5.5           | 93           | eBioscience                              |
| CD19                    | PE                    | 1D3          | eBioscience                              |
| CD3e                    | Biotin                | 145-2C11     | BD Biosciences                           |
| CD3e                    | PE-Cy7                | 145-2C11     | eBioscience                              |
| CD4                     | APC-eFluor 450        | RM4-5        | eBioscience                              |
| CD41                    | PE, FITC              | MWReg30      | BD Biosciences                           |
| CD45/B220               | Biotin                | RA3-6B2      | BD Biosciences                           |
| CD48                    | PerCP-Cy5.5           | HM48-1       | BioLegend                                |
| CD8                     | eFluor 450            | 53-6.7       | eBioscience                              |
| CXCR4                   | PE                    | 2B11         | BD Biosciences                           |
| F4/80                   | PE-Cy7                | BM8          | BioLegend                                |
| Galectin3               | PE                    | eBioM3/38    | eBioscience                              |
| GM-CSFR $\alpha$        | Alexa Fluor 700       | -            | R&D Systems                              |
| GR1                     | Biotin                | RB6-8C5      | BD Biosciences                           |
| GR1                     | APC-eFluor 780        | RB6-8C5      | eBioscience                              |
| Hoechst                 |                       | 33342        | Sigma-Aldrich, Oakville, ON, Canada      |
| IFN- $\gamma$           | APC                   | -            | BD Biosciences                           |
| IL-10                   | PE                    | -            | BD Biosciences                           |
| iNOS                    | APC                   | CXNFT        | eBioscience                              |
| Ki67                    | PE-eFluor 610         | SoIA15       | eBioscience                              |
| Ly6C                    | PerCP-Cy5.5, FITC     | AL-21        | eBioscience; BD Biosciences              |
| Ly6G                    | Biotin                | A8           | BioLegend                                |
| MHC-II                  | PE                    | MS/114.15.2  | eBioscience                              |
| NK-1.1                  | Biotin                | PK136        | BD Biosciences                           |
| Sca-1 (Ly6A/E)          | PE-Cy7, BV711         | D7           | BD Biosciences                           |
| Streptavidin            | BD Horizon V500, FITC | -            | BD Biosciences                           |
| Ter119                  | Biotin                | -            | BD Biosciences                           |
| TNF- $\alpha$           | PE-Cy7                | MP6-XT22     | BD Biosciences                           |

Table S1. Antibodies used in flow cytometry (Related to Materials and Methods)
